# Supplementary material for: A thermally stable pH-responsive “supramolecular buckle” based on the encapsulation of 4-(4-aminophenyl)-N-methylpyridinium by cucurbit[8]uril
Source: Royal Society of Chemistry journal article supplement (doi:10.1039/c5qo00168d), 2015-01-01
Supplement: c5qo00168d1.pdf [file c5qo00168d1.pdf]

## Electronic supplementary information

A thermally stable pH-responsive “supramolecular buckle” based on the encapsulation of  
4-(4-aminophenyl)-N-methylpyridinium by cucurbit[8]uril

1

Tian-You Zhou, Qiao-Yan Qi, Ying Zhang, Xiao-Na Xu, and Xin Zhao\*

Key Laboratory of Synthetic and Self-Assembly Chemistry for Organic Functional Molecules, Shanghai  
Institute of Organic Chemistry, Chinese Academy of Sciences, 345 Lingling Road, Shanghai 200032, China

Email: xzhao@sioc.ac.cn

### Contents

|                                                                                                                                            |    |
|--------------------------------------------------------------------------------------------------------------------------------------------|----|
| <b>Figure S1</b> UV-vis spectra of <b>1</b> upon the addition of CB[8] and Job’s plot at pH = 7 .....                                      | S2 |
| <b>Figure S2</b> ITC data for the titration of CB[8] with <b>1</b> .....                                                                   | S2 |
| <b>Figure S3</b> UV-vis spectra of <b>1</b> upon the addition of CB[8] and Job’s plot at pH=1 .....                                        | S3 |
| <b>Figure S4</b> Variable-temperature <sup>1</sup> H NMR spectra of CB[8] – <b>1</b> H <sup>+</sup> .....                                  | S3 |
| <b>Figure S5</b> Partial <sup>1</sup> H NMR spectra of <b>1</b> H <sup>+</sup> , 2,6-dihydroxynaphthalene, and their mixture with CB[8] .. | S4 |
| <b>Figure S6</b> 2D <sup>1</sup> H NMR COSY spectrum of <b>1</b> .....                                                                     | S4 |
| <b>Figure S7</b> 2D <sup>1</sup> H NMR COSY spectrum of <b>1</b> –CB[8] (2:1) .....                                                        | S5 |
| <b>Figure S8</b> 2D <sup>1</sup> H NMR COSY spectrum of <b>1</b> –CB[8] (1:0.3) .....                                                      | S6 |
| <b>Figures S9-10</b> <sup>1</sup> H NMR and <sup>13</sup> C NMR spectra of <b>1</b> .....                                                  | S7 |

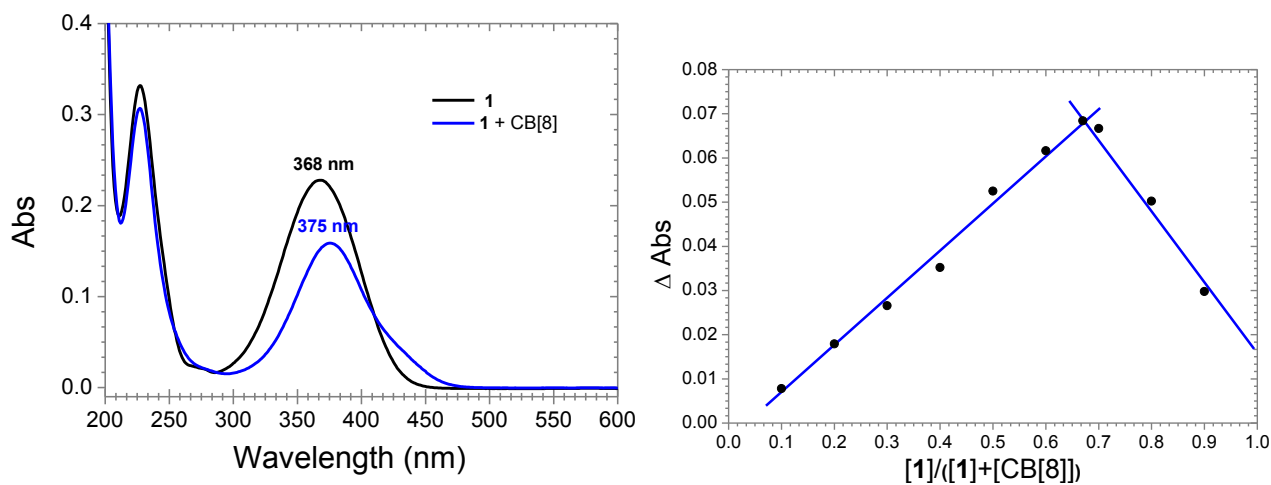

**Figure S1.** UV-vis spectra of **1** (13.3 μM) without and with CB[8] (6.7 μM) in water (pH = 7) at 25 °C (left), and Job's plot indicating a 1:2 stoichiometry for CB[8] and **1** (right). The total concentration used for generating the Job's plot was 20 μM.

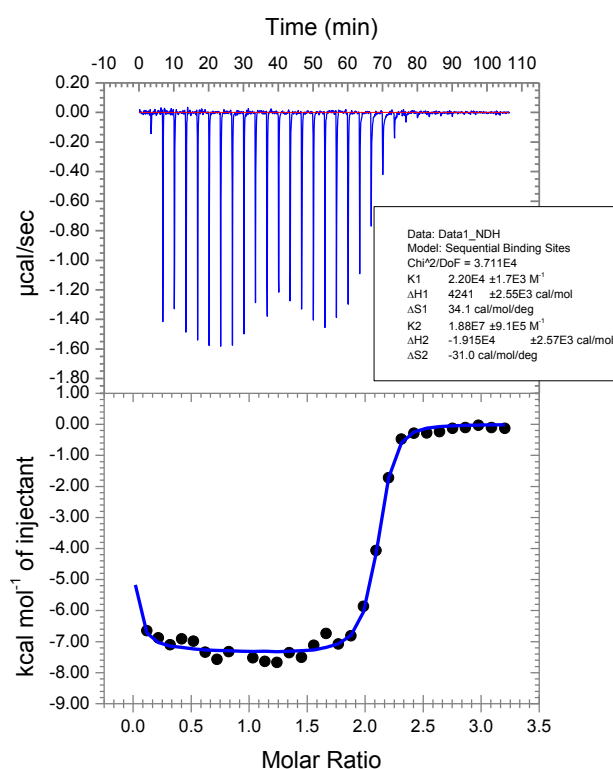

**Figure S2.** ITC data for the titration of CB[8] (0.1 mM) with **1** (2.0 mM) in a Tris-buffer solution (10 mM, pH 7.0) at 25 °C.

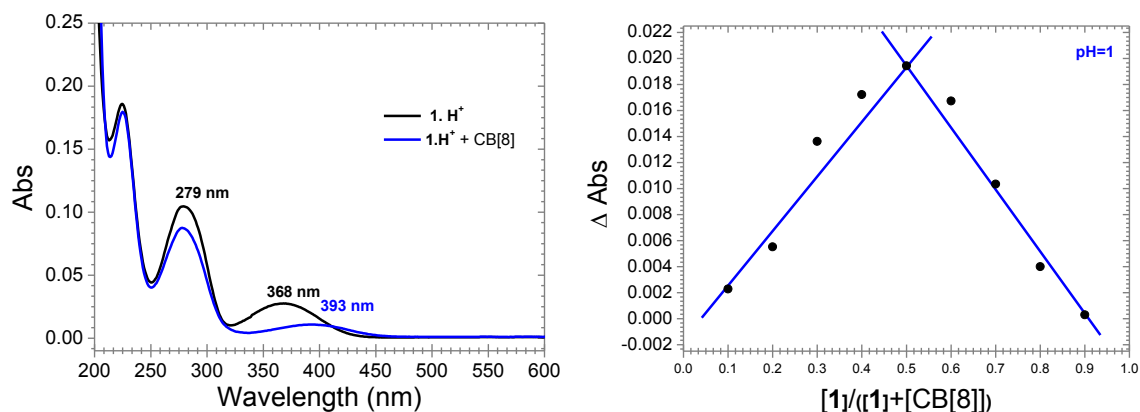

**Figure S3.** UV-vis spectra of **1** (13.3  $\mu\text{M}$ ) without and with CB[8] (6.7  $\mu\text{M}$ ) in an aqueous hydrochloric acid solution (pH = 1.0) at 25  $^{\circ}\text{C}$  (left), and Job's plot indicating a 1:1 stoichiometry for **1**  $\text{H}^+$  and CB[8] (right). The total concentration used for generating the Job's plot was 20  $\mu\text{M}$ .

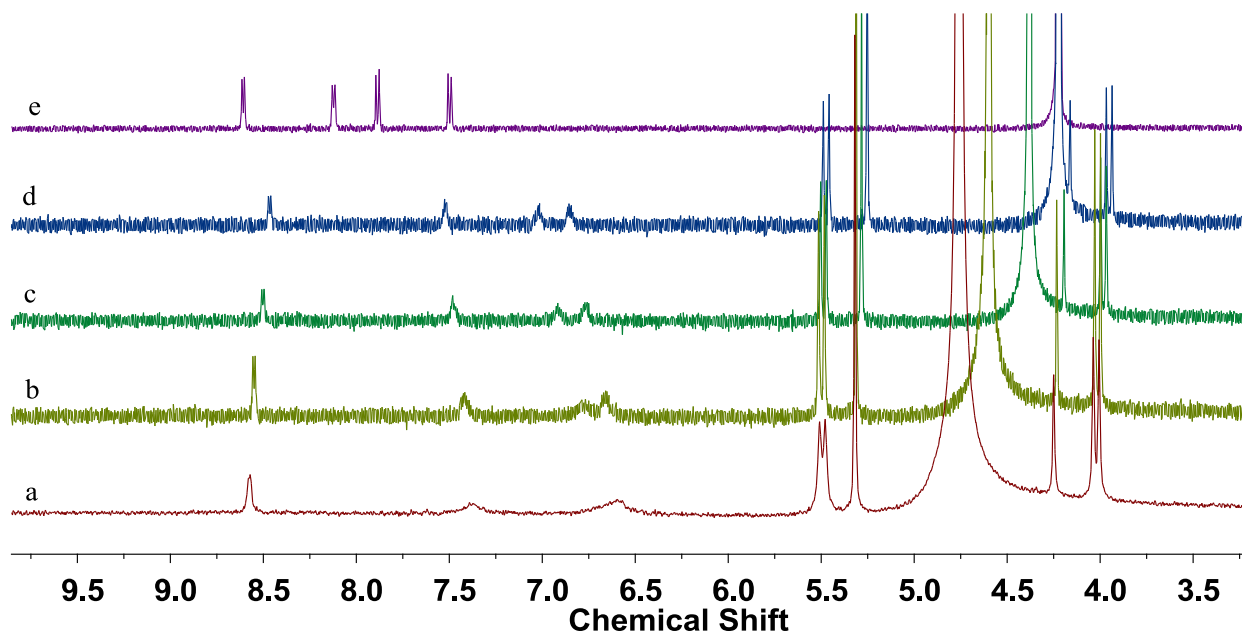

**Figure S4.** Partial  $^1\text{H}$  NMR spectra (500 MHz) of CB[8]-**1**  $\text{H}^+$  at (a) 25  $^{\circ}\text{C}$ , (b) 40  $^{\circ}\text{C}$ , (c) 60  $^{\circ}\text{C}$  and (d) 75  $^{\circ}\text{C}$ , and (e) **1**  $\text{H}^+$  at 75  $^{\circ}\text{C}$  in  $\text{D}_2\text{O}$ . The spectra were calibrated by the temperature dependence of HDO chemical shifts reported by H. E. Gottlieb et al. (*J. Org. Chem.* **1997**, *61*, 7512-7515.).

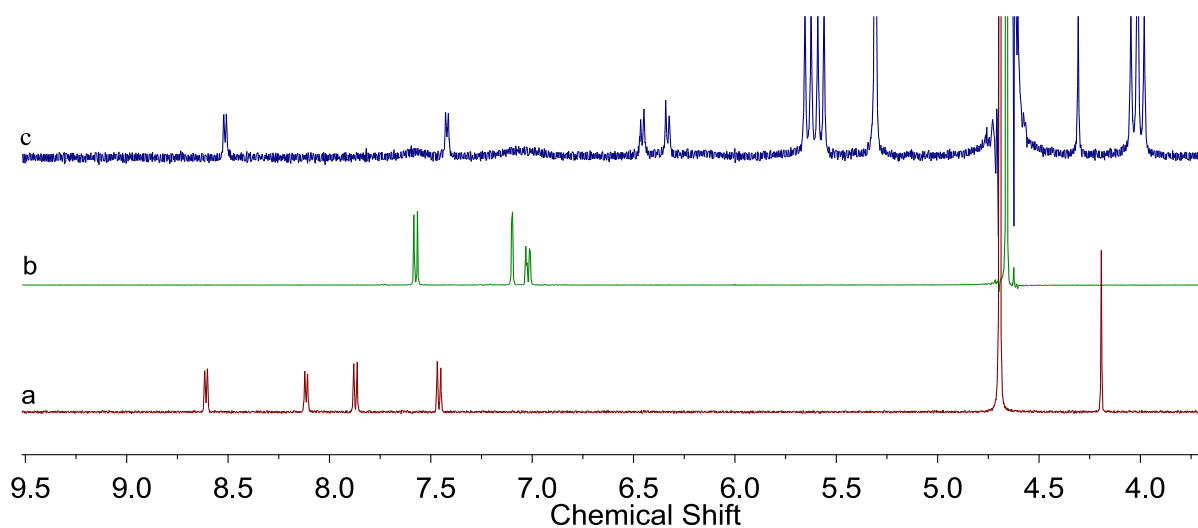

**Figure S5.**  $^1\text{H}$  NMR spectra (500 MHz) of (a)  $\mathbf{1} \text{ H}^+$ , (b) 2,6-dihydroxynaphthalene, and (c) mixture of  $\mathbf{1} \text{ H}^+$ , 2,6-dihydroxynaphthalene and CB[8] (1:1:1) in  $\text{D}_2\text{O}$  at pD=1.

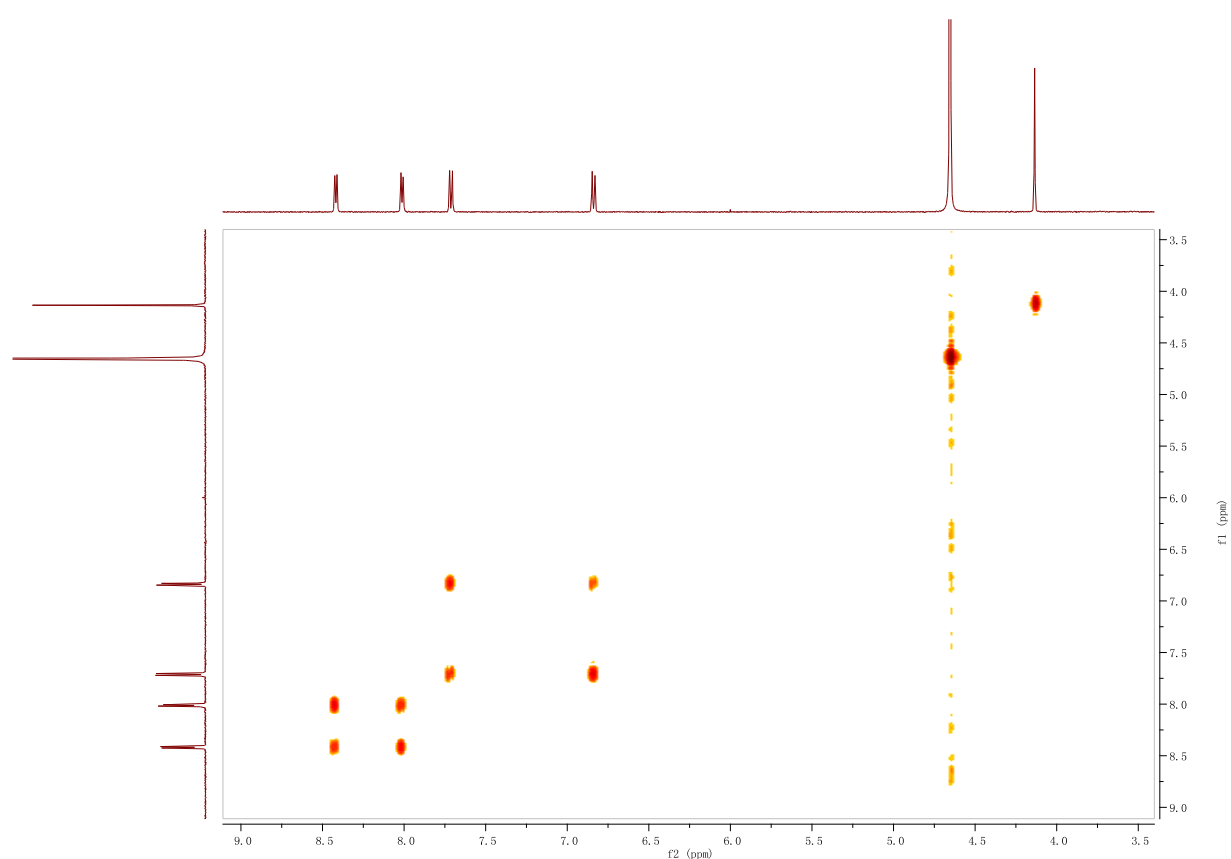

**Figure S6.** 2D  $^1\text{H}$  NMR COSY spectrum (400 MHz, 293 K) of  $\mathbf{1}$  in  $\text{D}_2\text{O}$ .

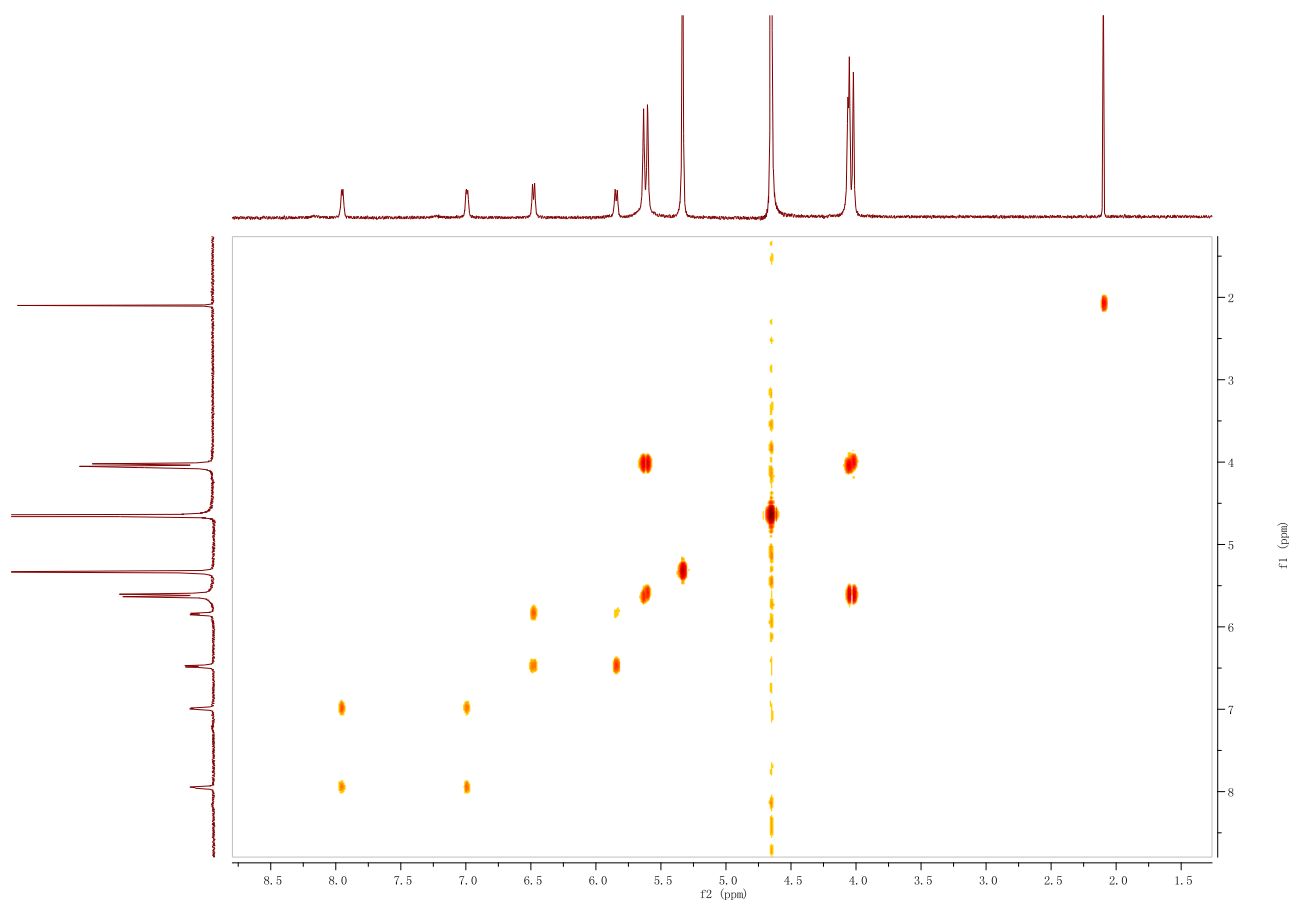

**Figure S7.** 2D <sup>1</sup>H NMR COSY spectrum (400 MHz, 293 K) of the solution of **1** and CB[8] (2:1) in D<sub>2</sub>O.

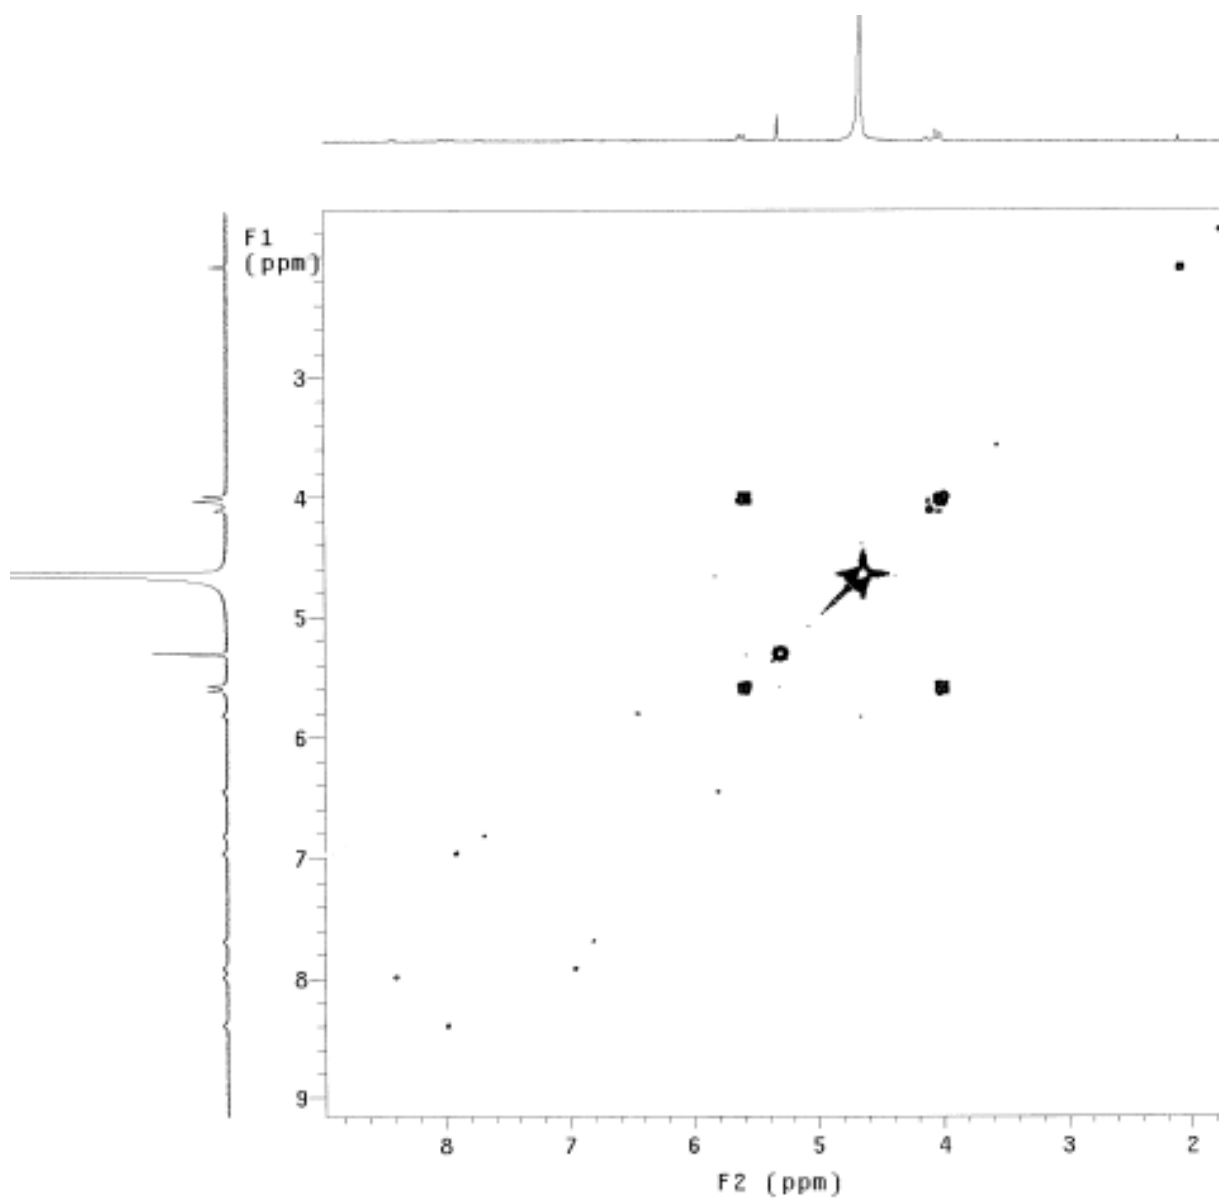

**Figure S8.** 2D <sup>1</sup>H NMR COSY spectrum (400 MHz, 293 K) of the solution of **1** and CB[8] (1:0.3) in D<sub>2</sub>O.

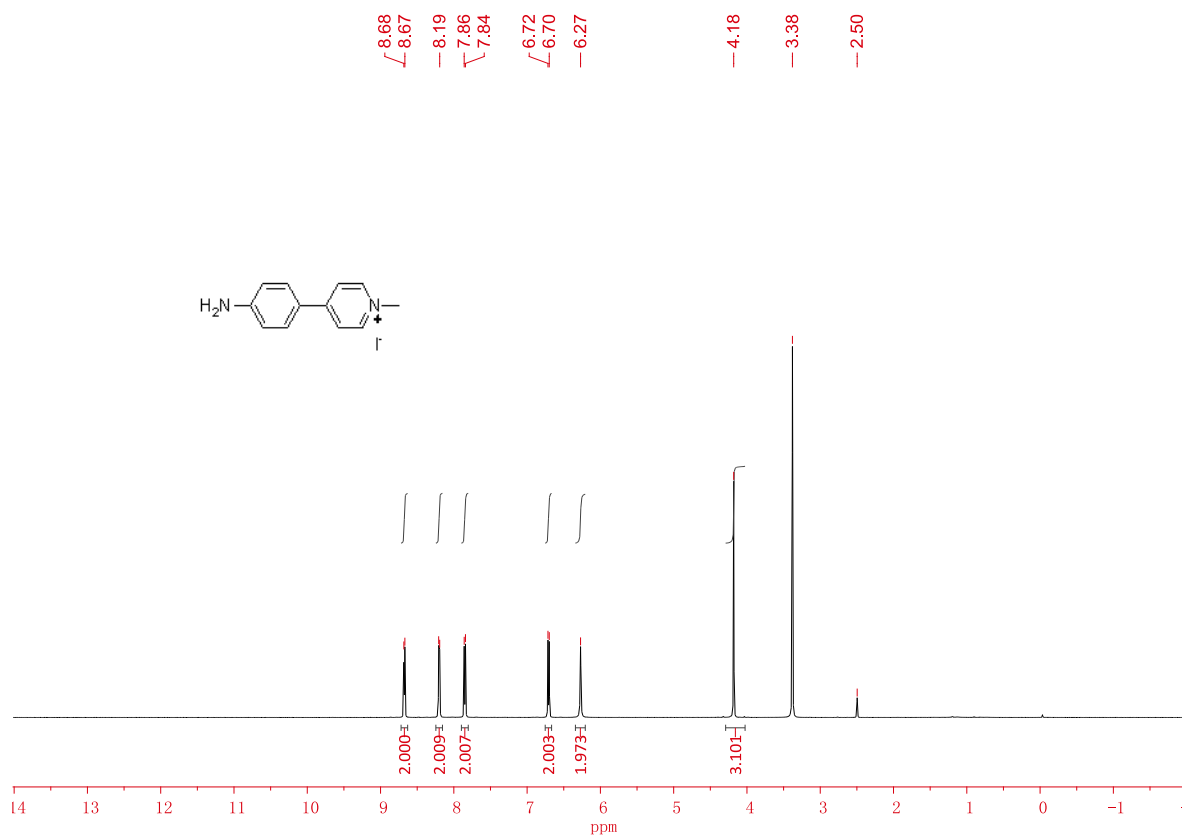

**Figure S9.** <sup>1</sup>H NMR spectrum (500 MHz, DMSO-*d*<sub>6</sub>) of compound 1.

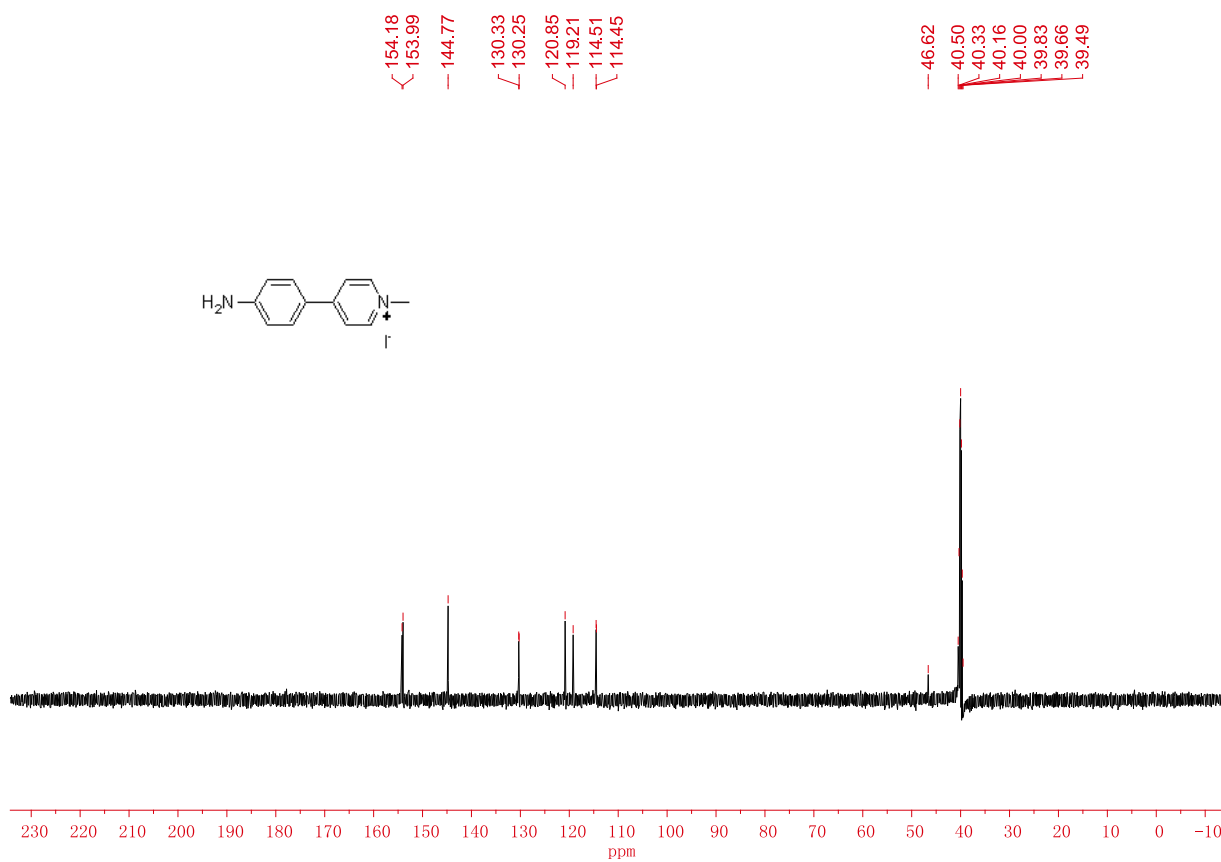

**Figure S10.** <sup>13</sup>C NMR spectrum (125 MHz, DMSO-*d*<sub>6</sub>) of compound 1.
